# Supplementary material for: BIM and BEM Methodologies Integration in Energy-Efficient Buildings Using Experimental Design
Source: MDPI journal article supplement (doi:10.3390/buildings11100491), 2021-10-19
Supplement: s1 [file s1]

## Article

# BIM and BEM Methodologies Integration in Energy-Efficient Buildings Using Experimental Design

Jorge González <sup>1</sup>, Carlos Alberto Pereira Soares <sup>1</sup>, Mohammad Najjar <sup>2</sup> and Assed N. Haddad <sup>3,\*</sup>

<sup>1</sup> Programa de Engenharia Civil, Universidade de Federal Fluminense, Niterói 24210-240, Brazil; jorgegonzalez@id.uff.br (J.G.); capsoares@id.uff.br (C.A.P.S.)

<sup>2</sup> Departamento de Construção Civil, Universidade de Federal do Rio de Janeiro, Rio de Janeiro 21941-901, Brazil; mnajjar@poli.ufrj.br

<sup>3</sup> Programa de Engenharia Ambiental, Universidade de Federal do Rio de Janeiro, Rio de Janeiro 21941-901, Brazil

\* Correspondence: assed@poli.ufrj.br

## 1. Linear Regression and ANOVA Results via Minitab for Armação dos Búzios, Brazil.

*General Factorial Regression: EUI versus A, B, C*

**Table S1.** Factor Information for Armação dos Búzios.

| Factor | Levels | Values              |
|--------|--------|---------------------|
| A      | 3      | 1, 2, 3             |
| B      | 2      | 1, 2                |
| C      | 7      | 1, 2, 3, 4, 5, 6, 7 |

**Table S2.** Analysis of Variance for Armação dos Búzios.

| Source             | DF | Adj SS  | Adj MS  | F-Value  | P-Value |
|--------------------|----|---------|---------|----------|---------|
| Model              | 29 | 28221.7 | 973.16  | 5244.58  | 0.000   |
| Linear             | 9  | 28048.6 | 3116.52 | 16795.60 | 0.000   |
| A                  | 2  | 4375.6  | 2187.81 | 11790.59 | 0.000   |
| B                  | 1  | 3456.2  | 3456.21 | 18626.30 | 0.000   |
| C                  | 6  | 20216.8 | 3369.47 | 18158.81 | 0.000   |
| 2-Way Interactions | 20 | 173.0   | 8.65    | 46.63    | 0.000   |
| A*B                | 2  | 100.0   | 50.00   | 269.46   | 0.000   |
| A*C                | 12 | 45.9    | 3.83    | 20.63    | 0.000   |
| B*C                | 6  | 27.1    | 4.52    | 24.34    | 0.000   |
| Error              | 12 | 2.2     | 0.19    | -        | -       |
| Total              | 41 | 28223.9 | -       | -        | -       |

**Table S3.** Model Summary for Armação dos Búzios.

| S        | R-sq   | R-sq(adj) | R-sq(pred) |
|----------|--------|-----------|------------|
| 0.430762 | 99.99% | 99.97%    | 99.90%     |

**Table S4.** Coefficients for Armação dos Búzios.

| Term     | Coef    | SE Coef | T-Value | P-Value | VIF  |
|----------|---------|---------|---------|---------|------|
| Constant | 131.833 | 0.066   | 1983.41 | 0.000   | -    |
| 1        | 10.9524 | 0.0940  | 116.51  | 0.000   | 1.33 |

|     |         |        |        |       |      |
|-----|---------|--------|--------|-------|------|
| 2   | 2.6667  | 0.0940 | 28.37  | 0.000 | 1.33 |
| B   |         |        |        |       |      |
| 1   | 9.0714  | 0.0665 | 136.48 | 0.000 | 1.00 |
| C   |         |        |        |       |      |
| 1   | 43.500  | 0.163  | 267.18 | 0.000 | 1.71 |
| 2   | 20.667  | 0.163  | 126.94 | 0.000 | 1.71 |
| 3   | −7.667  | 0.163  | −47.09 | 0.000 | 1.71 |
| 4   | −3.000  | 0.163  | −18.43 | 0.000 | 1.71 |
| 5   | −15.867 | 0.163  | −97.45 | 0.000 | 1.71 |
| 6   | −15.467 | 0.163  | −95.00 | 0.000 | 1.71 |
| A*B |         |        |        |       |      |
| 1 1 | 1.4286  | 0.0940 | 15.20  | 0.000 | 1.33 |
| 2 1 | 0.7143  | 0.0940 | 7.60   | 0.000 | 1.33 |
| A*C |         |        |        |       |      |
| 1 1 | 2.214   | 0.230  | 9.62   | 0.000 | 2.29 |
| 1 2 | 1.048   | 0.230  | 4.55   | 0.001 | 2.29 |
| 1 3 | −0.119  | 0.230  | −0.52  | 0.615 | 2.29 |
| 1 4 | −0.286  | 0.230  | −1.24  | 0.238 | 2.29 |
| 1 5 | −0.919  | 0.230  | −3.99  | 0.002 | 2.29 |
| 1 6 | −0.819  | 0.230  | −3.56  | 0.004 | 2.29 |
| 2 1 | 0.500   | 0.230  | 2.17   | 0.051 | 2.29 |
| 2 2 | 0.333   | 0.230  | 1.45   | 0.173 | 2.29 |
| 2 3 | −0.333  | 0.230  | −1.45  | 0.173 | 2.29 |
| 2 4 | −0.000  | 0.230  | −0.00  | 1.000 | 2.29 |
| 2 5 | −0.133  | 0.230  | −0.58  | 0.573 | 2.29 |
| 2 6 | −0.033  | 0.230  | −0.14  | 0.887 | 2.29 |
| B*C |         |        |        |       |      |
| 1 1 | 1.595   | 0.163  | 9.80   | 0.000 | 1.71 |
| 1 2 | 0.762   | 0.163  | 4.68   | 0.001 | 1.71 |
| 1 3 | −0.238  | 0.163  | −1.46  | 0.169 | 1.71 |
| 1 4 | −0.238  | 0.163  | −1.46  | 0.169 | 1.71 |
| 1 5 | −0.371  | 0.163  | −2.28  | 0.042 | 1.71 |
| 1 6 | −0.771  | 0.163  | −4.74  | 0.000 | 1.71 |

Table S5. Regression Equation for Armação dos Búzios.

|     |   |                                                                                         |
|-----|---|-----------------------------------------------------------------------------------------|
| EUI | = | 131.833 + 10.9524 A_1 + 2.6667 A_2 − 13.6190 A_3 + 9.0714 B_1 − 9.0714 B_2 + 43.500 C_1 |
|     |   | + 20.667 C_2 − 7.667 C_3 − 3.000 C_4 − 15.867 C_5 − 15.467 C_6 − 22.167 C_7             |
|     |   | + 1.4286 A*B_1 1 − 1.4286 A*B_1 2 + 0.7143 A*B_2 1 − 0.7143 A*B_2 2 − 2.1429 A*B_3 1    |
|     |   | + 2.1429 A*B_3 2 + 2.214 A*C_1 1 + 1.048 A*C_1 2 − 0.119 A*C_1 3 − 0.286 A*C_1 4        |
|     |   | − 0.919 A*C_1 5 − 0.819 A*C_1 6 − 1.119 A*C_1 7 + 0.500 A*C_2 1 + 0.333 A*C_2 2         |
|     |   | − 0.333 A*C_2 3 − 0.000 A*C_2 4 − 0.133 A*C_2 5 − 0.033 A*C_2 6 − 0.333 A*C_2 7         |
|     |   | − 2.714 A*C_3 1 − 1.381 A*C_3 2 + 0.452 A*C_3 3 + 0.286 A*C_3 4 + 1.052 A*C_3 5         |
|     |   | + 0.852 A*C_3 6 + 1.452 A*C_3 7 + 1.595 B*C_1 1 + 0.762 B*C_1 2 − 0.238 B*C_1 3         |
|     |   | − 0.238 B*C_1 4 − 0.371 B*C_1 5 − 0.771 B*C_1 6 − 0.738 B*C_1 7 − 1.595 B*C_2 1         |
|     |   | − 0.762 B*C_2 2 + 0.238 B*C_2 3 + 0.238 B*C_2 4 + 0.371 B*C_2 5 + 0.771 B*C_2 6         |
|     |   | + 0.738 B*C_2 7                                                                         |

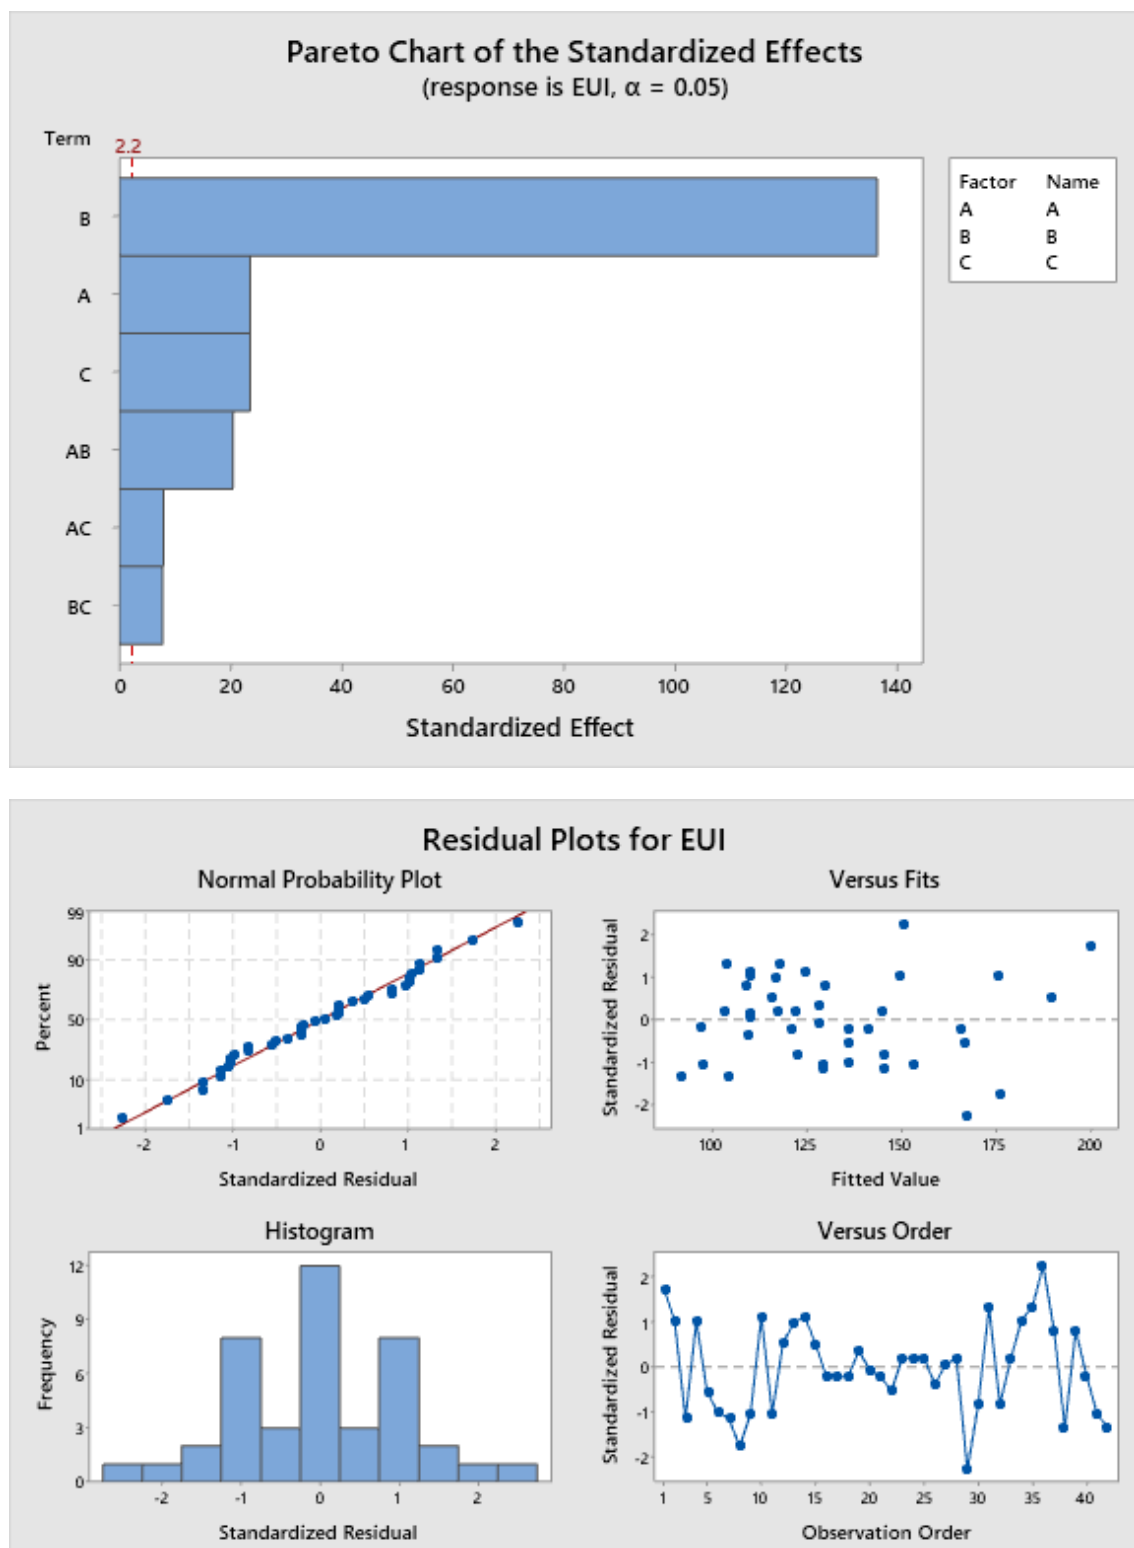

**Figure S1.** Graphics of Pareto Charts and Residual Plots for Armação dos Búzios, Brazil.

## 2. Linear Regression and ANOVA Results via Minitab for Capri, Italy.

*General Factorial Regression: EUI<sub>Capri</sub> versus A, B, C*

**Table S6.** Factor Information for Capri.

| Factor | Levels | Values |
|--------|--------|--------|
|--------|--------|--------|

|   |   |                     |
|---|---|---------------------|
| A | 3 | 1, 2, 3             |
| B | 2 | 1, 2                |
| C | 7 | 1, 2, 3, 4, 5, 6, 7 |

**Table S7.** Analysis of Variance for Capri.

| Source             | DF | Adj SS  | Adj MS  | F-Value   | P-Value |
|--------------------|----|---------|---------|-----------|---------|
| Model              | 29 | 49813.8 | 1717.72 | 35773.98  | 0.000   |
| Linear             | 9  | 49771.6 | 5530.18 | 115173.98 | 0.000   |
| A                  | 2  | 831.8   | 415.89  | 8661.44   | 0.000   |
| B                  | 1  | 1317.1  | 1317.12 | 27430.93  | 0.000   |
| C                  | 6  | 47622.7 | 7937.12 | 165302.00 | 0.000   |
| 2-Way Interactions | 20 | 42.2    | 2.11    | 43.98     | 0.000   |
| A*B                | 2  | 5.0     | 2.49    | 51.83     | 0.000   |
| A*C                | 12 | 14.3    | 1.19    | 24.84     | 0.000   |
| B*C                | 6  | 22.9    | 3.82    | 79.65     | 0.000   |
| Error              | 12 | 0.6     | 0.05    |           |         |
| Total              | 41 | 49814.4 |         |           |         |

**Table S8.** Model Summary for Capri.

| S        | R-sq    | R-sq(adj) | R-sq(pred) |
|----------|---------|-----------|------------|
| 0.219125 | 100.00% | 100.00%   | 99.99%     |

**Table S9.** Coefficients for Capri.

| Term     | Coef     | SE Coef | T-Value | P-Value | VIF  |
|----------|----------|---------|---------|---------|------|
| Constant | 122.581  | 0.034   | 3625.39 | 0.000   | -    |
| A        |          |         |         |         |      |
| 1        | 4.3190   | 0.0478  | 90.32   | 0.000   | 1.33 |
| 2        | 1.8048   | 0.0478  | 37.74   | 0.000   | 1.33 |
| B        |          |         |         |         |      |
| 1        | 5.6000   | 0.0338  | 165.62  | 0.000   | 1.00 |
| C        |          |         |         |         |      |
| 1        | 52.2524  | 0.0828  | 630.90  | 0.000   | 1.71 |
| 2        | 20.4190  | 0.0828  | 246.54  | 0.000   | 1.71 |
| 3        | −38.1810 | 0.0828  | −461.00 | 0.000   | 1.71 |
| 4        | 7.7524   | 0.0828  | 93.60   | 0.000   | 1.71 |
| 5        | 4.7524   | 0.0828  | 57.38   | 0.000   | 1.71 |
| 6        | 9.2524   | 0.0828  | 111.71  | 0.000   | 1.71 |
| A*B      |          |         |         |         |      |
| 1 1      | 0.2714   | 0.0478  | 5.68    | 0.000   | 1.33 |
| 2 1      | 0.2143   | 0.0478  | 4.48    | 0.001   | 1.33 |
| A*C      |          |         |         |         |      |
| 1 1      | 0.848    | 0.117   | 7.24    | 0.000   | 2.29 |
| 1 2      | 0.181    | 0.117   | 1.54    | 0.148   | 2.29 |
| 1 3      | −0.619   | 0.117   | −5.29   | 0.000   | 2.29 |
| 1 4      | 0.348    | 0.117   | 2.97    | 0.012   | 2.29 |
| 1 5      | 0.348    | 0.117   | 2.97    | 0.012   | 2.29 |
| 1 6      | −0.152   | 0.117   | −1.30   | 0.218   | 2.29 |
| 2 1      | 0.362    | 0.117   | 3.09    | 0.009   | 2.29 |

|     |         |        |       |       |      |
|-----|---------|--------|-------|-------|------|
| 2 2 | 0.195   | 0.117  | 1.67  | 0.121 | 2.29 |
| 2 3 | −0.255  | 0.117  | −2.18 | 0.050 | 2.29 |
| 2 4 | −0.138  | 0.117  | −1.18 | 0.261 | 2.29 |
| 2 5 | −0.138  | 0.117  | −1.18 | 0.261 | 2.29 |
| 2 6 | 0.362   | 0.117  | 3.09  | 0.009 | 2.29 |
| B*C |         |        |       |       |      |
| 1 1 | 1.2333  | 0.0828 | 14.89 | 0.000 | 1.71 |
| 1 2 | 0.4000  | 0.0828 | 4.83  | 0.000 | 1.71 |
| 1 3 | −0.8000 | 0.0828 | −9.66 | 0.000 | 1.71 |
| 1 4 | 0.0667  | 0.0828 | 0.80  | 0.437 | 1.71 |
| 1 5 | 0.0667  | 0.0828 | 0.80  | 0.437 | 1.71 |
| 1 6 | 0.2333  | 0.0828 | 2.82  | 0.016 | 1.71 |

Table S10. Regression Equation for Capri.

$$\begin{aligned}
 \text{EUI}_{\text{Capri}} = & 122.581 + 4.3190 A_1 + 1.8048 A_2 - 6.1238 A_3 + 5.6000 B_1 - 5.6000 B_2 \\
 & + 52.2524 C_1 + 20.4190 C_2 - 38.1810 C_3 + 7.7524 C_4 + 4.7524 C_5 + 9.2524 C_6 \\
 & - 56.2476 C_7 + 0.2714 A*B_1 - 0.2714 A*B_2 + 0.2143 A*B_3 - 0.2143 A*B_4 \\
 & - 0.4857 A*B_5 + 0.4857 A*B_6 + 0.848 A*C_1 + 0.181 A*C_2 - 0.619 A*C_3 \\
 & + 0.348 A*C_4 + 0.348 A*C_5 - 0.152 A*C_6 - 0.952 A*C_7 + 0.362 A*C_8 \\
 & + 0.195 A*C_9 - 0.255 A*C_{10} - 0.138 A*C_{11} - 0.138 A*C_{12} + 0.362 A*C_{13} \\
 & - 0.388 A*C_{14} - 1.210 A*C_{15} - 0.376 A*C_{16} + 0.874 A*C_{17} - 0.210 A*C_{18} \\
 & - 0.210 A*C_{19} - 0.210 A*C_{20} + 1.340 A*C_{21} + 1.2333 B*C_1 + 0.4000 B*C_2 \\
 & - 0.8000 B*C_3 + 0.0667 B*C_4 + 0.0667 B*C_5 + 0.2333 B*C_6 - 1.2000 B*C_7 \\
 & - 1.2333 B*C_8 - 0.4000 B*C_9 + 0.8000 B*C_{10} - 0.0667 B*C_{11} \\
 & - 0.0667 B*C_{12} - 0.2333 B*C_{13} + 1.2000 B*C_{14}
 \end{aligned}$$

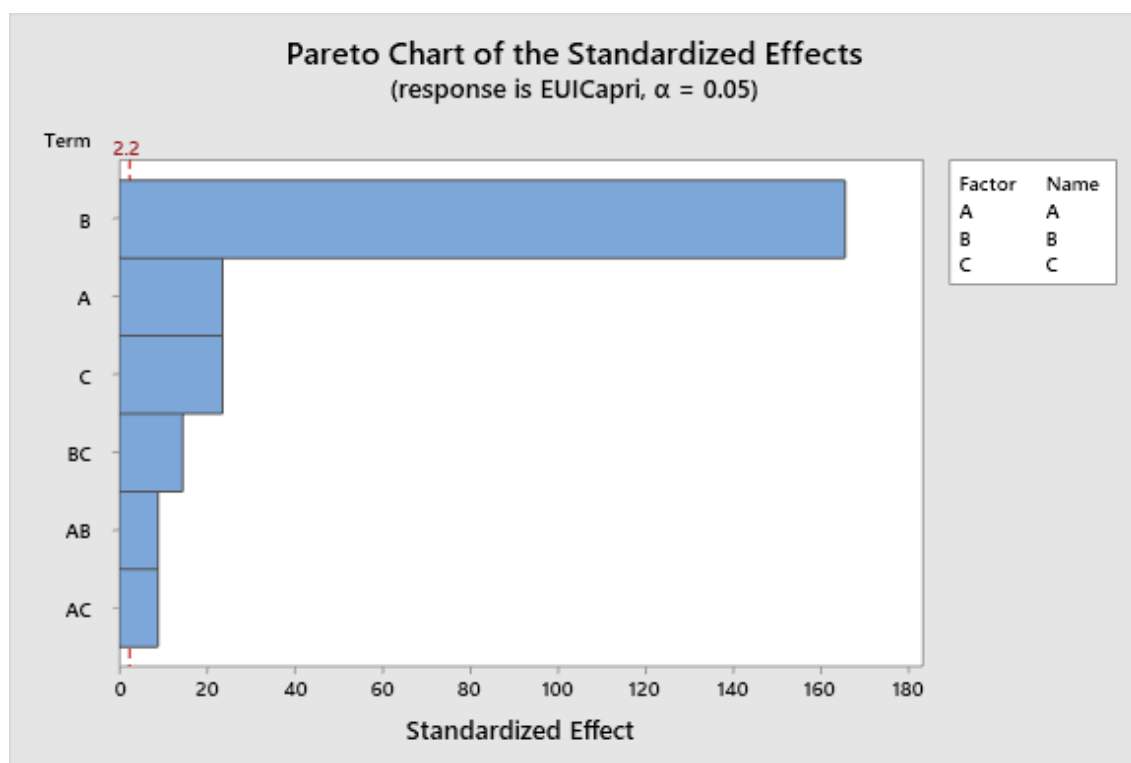

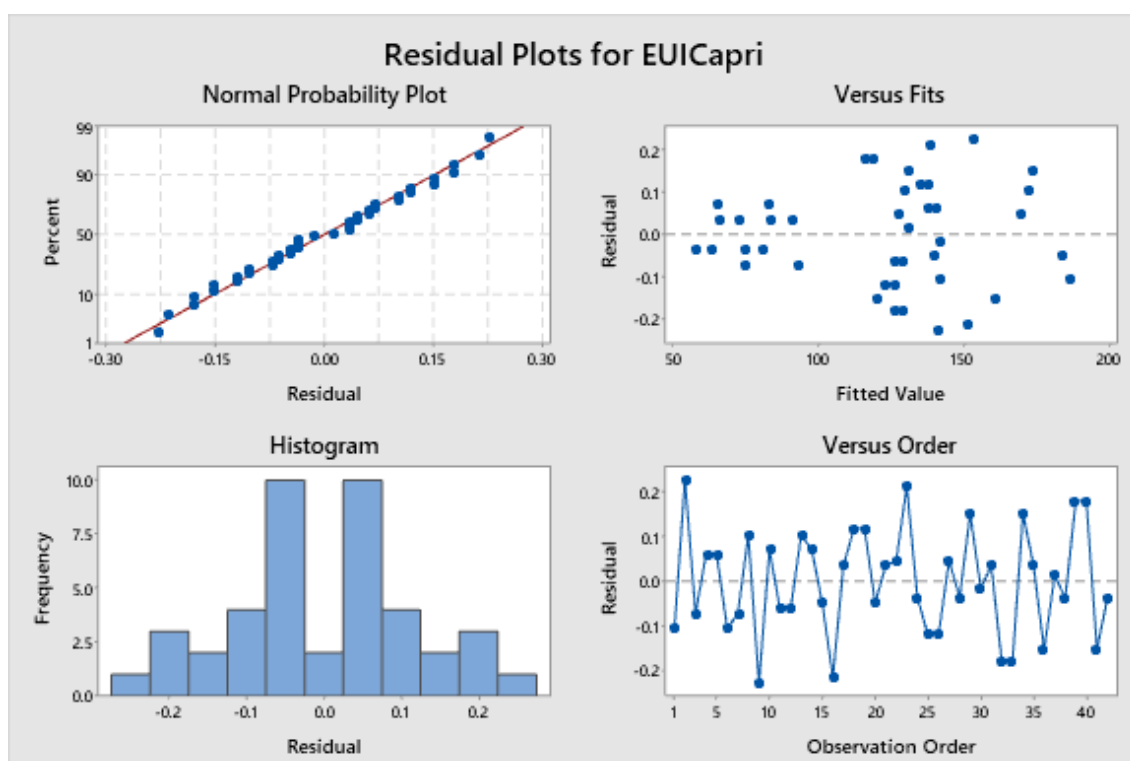

Figure S2. Graphics of Pareto Charts and Residual Plots for Capri, Italy.

### 3. Linear Regression and ANOVA Results via Minitab for Punta Cana, Dominican Republic

General Factorial Regression: *EUIPtaCana* versus *A*, *B*, *C*

Table S11. Factor Information for Punta Cana.

| Factor | Levels | Values              |
|--------|--------|---------------------|
| A      | 3      | 1, 2, 3             |
| B      | 2      | 1, 2                |
| C      | 7      | 1, 2, 3, 4, 5, 6, 7 |

Table S12. Analysis of Variance for Punta Cana.

| Source             | DF | Adj SS  | Adj MS  | F-Value  | P-Value |
|--------------------|----|---------|---------|----------|---------|
| Model              | 29 | 29530.3 | 1018.29 | 6842.88  | 0.000   |
| Linear             | 9  | 29378.4 | 3264.27 | 21935.88 | 0.000   |
| A                  | 2  | 3997.0  | 1998.50 | 13429.92 | 0.000   |
| B                  | 1  | 4736.1  | 4736.10 | 31826.56 | 0.000   |
| C                  | 6  | 20645.3 | 3440.89 | 23122.76 | 0.000   |
| 2-Way Interactions | 20 | 151.9   | 7.59    | 51.03    | 0.000   |
| A*B                | 2  | 82.0    | 41.02   | 275.68   | 0.000   |
| A*C                | 12 | 31.5    | 2.63    | 17.64    | 0.000   |
| B*C                | 6  | 38.3    | 6.39    | 42.92    | 0.000   |
| Error              | 12 | 1.8     | 0.15    |          |         |
| Total              | 41 | 29532.1 |         |          |         |

Table S13. Model Summary for Punta Cana.

| S        | R-sq   | R-sq(adj) | R-sq(pred) |
|----------|--------|-----------|------------|
| 0.385758 | 99.99% | 99.98%    | 99.93%     |

**Table S14.** Coefficients for Punta Cana.

| Term     | Coef    | SE Coef | T-Value | P-Value | VIF  |
|----------|---------|---------|---------|---------|------|
| Constant | 131.286 | 0.060   | 2205.60 | 0.000   |      |
| A        |         |         |         |         |      |
| 1        | 7.3571  | 0.0842  | 87.40   | 0.000   | 1.33 |
| 2        | 6.4286  | 0.0842  | 76.37   | 0.000   | 1.33 |
| B        |         |         |         |         |      |
| 1        | 10.6190 | 0.0595  | 178.40  | 0.000   | 1.00 |
| C        |         |         |         |         |      |
| 1        | 37.714  | 0.146   | 258.67  | 0.000   | 1.71 |
| 2        | 30.548  | 0.146   | 209.51  | 0.000   | 1.71 |
| 3        | −7.452  | 0.146   | −51.11  | 0.000   | 1.71 |
| 4        | −7.619  | 0.146   | −52.26  | 0.000   | 1.71 |
| 5        | −13.369 | 0.146   | −91.69  | 0.000   | 1.71 |
| 6        | −20.202 | 0.146   | −138.56 | 0.000   | 1.71 |
| A*B      |         |         |         |         |      |
| 1 1      | 1.0238  | 0.0842  | 12.16   | 0.000   | 1.33 |
| 2 1      | 0.9524  | 0.0842  | 11.31   | 0.000   | 1.33 |
| A*C      |         |         |         |         |      |
| 1 1      | 1.143   | 0.206   | 5.54    | 0.000   | 2.29 |
| 1 2      | 0.810   | 0.206   | 3.93    | 0.002   | 2.29 |
| 1 3      | −0.190  | 0.206   | −0.92   | 0.374   | 2.29 |
| 1 4      | −0.524  | 0.206   | −2.54   | 0.026   | 2.29 |
| 1 5      | −0.274  | 0.206   | −1.33   | 0.209   | 2.29 |
| 1 6      | −0.440  | 0.206   | −2.14   | 0.054   | 2.29 |
| 2 1      | 1.071   | 0.206   | 5.20    | 0.000   | 2.29 |
| 2 2      | 0.738   | 0.206   | 3.58    | 0.004   | 2.29 |
| 2 3      | −0.262  | 0.206   | −1.27   | 0.228   | 2.29 |
| 2 4      | −0.095  | 0.206   | −0.46   | 0.652   | 2.29 |
| 2 5      | −0.345  | 0.206   | −1.67   | 0.120   | 2.29 |
| 2 6      | −0.512  | 0.206   | −2.48   | 0.029   | 2.29 |
| B*C      |         |         |         |         |      |
| 1 1      | 1.714   | 0.146   | 11.76   | 0.000   | 1.71 |
| 1 2      | 1.214   | 0.146   | 8.33    | 0.000   | 1.71 |
| 1 3      | −0.452  | 0.146   | −3.10   | 0.009   | 1.71 |
| 1 4      | −0.286  | 0.146   | −1.96   | 0.074   | 1.71 |
| 1 5      | −0.536  | 0.146   | −3.67   | 0.003   | 1.71 |
| 1 6      | −0.702  | 0.146   | −4.82   | 0.000   | 1.71 |

**Table S15.** Regression Equation for Punta Cana.

|           |   |                                                                                                                                                                                                                                                                                                                                                                                                                                                             |
|-----------|---|-------------------------------------------------------------------------------------------------------------------------------------------------------------------------------------------------------------------------------------------------------------------------------------------------------------------------------------------------------------------------------------------------------------------------------------------------------------|
| EUIPtCana | = | $ \begin{aligned} &131.286 + 7.3571 A_1 + 6.4286 A_2 - 13.7857 A_3 + 10.6190 B_1 - 10.6190 B_2 \\ &+ 37.714 C_1 + 30.548 C_2 - 7.452 C_3 - 7.619 C_4 - 13.369 C_5 - 20.202 C_6 \\ &- 19.619 C_7 + 1.0238 A*B_1 1 - 1.0238 A*B_1 2 + 0.9524 A*B_2 1 - 0.9524 A*B_2 2 \\ &- 1.9762 A*B_3 1 + 1.9762 A*B_3 2 + 1.143 A*C_1 1 + 0.810 A*C_1 2 - 0.190 A*C_1 \\ &3 - 0.524 A*C_1 4 - 0.274 A*C_1 5 - 0.440 A*C_1 6 - 0.524 A*C_1 7 + 1.071 A*C_2 \end{aligned} $ |
|-----------|---|-------------------------------------------------------------------------------------------------------------------------------------------------------------------------------------------------------------------------------------------------------------------------------------------------------------------------------------------------------------------------------------------------------------------------------------------------------------|

$$\begin{aligned}
&1 + 0.738 A^*C_{\_2 \ 2} - 0.262 A^*C_{\_2 \ 3} - 0.095 A^*C_{\_2 \ 4} - 0.345 A^*C_{\_2 \ 5} - 0.512 A^*C_{\_2 \ 6} - 0.595 A^*C_{\_2 \ 7} - 2.214 A^*C_{\_3 \ 1} - 1.548 A^*C_{\_3 \ 2} + 0.452 A^*C_{\_3 \ 3} + 0.619 A^*C_{\_3 \ 4} \\
&+ 0.619 A^*C_{\_3 \ 5} + 0.952 A^*C_{\_3 \ 6} + 1.119 A^*C_{\_3 \ 7} + 1.714 B^*C_{\_1 \ 1} + 1.214 B^*C_{\_1 \ 2} - 0.452 B^*C_{\_1 \ 3} - 0.286 B^*C_{\_1 \ 4} - 0.536 B^*C_{\_1 \ 5} - 0.702 B^*C_{\_1 \ 6} - 0.952 B^*C_{\_1 \ 7} \\
&- 1.714 B^*C_{\_2 \ 1} - 1.214 B^*C_{\_2 \ 2} + 0.452 B^*C_{\_2 \ 3} + 0.286 B^*C_{\_2 \ 4} + 0.536 B^*C_{\_2 \ 5} + 0.702 B^*C_{\_2 \ 6} + 0.952 B^*C_{\_2 \ 7}
\end{aligned}$$

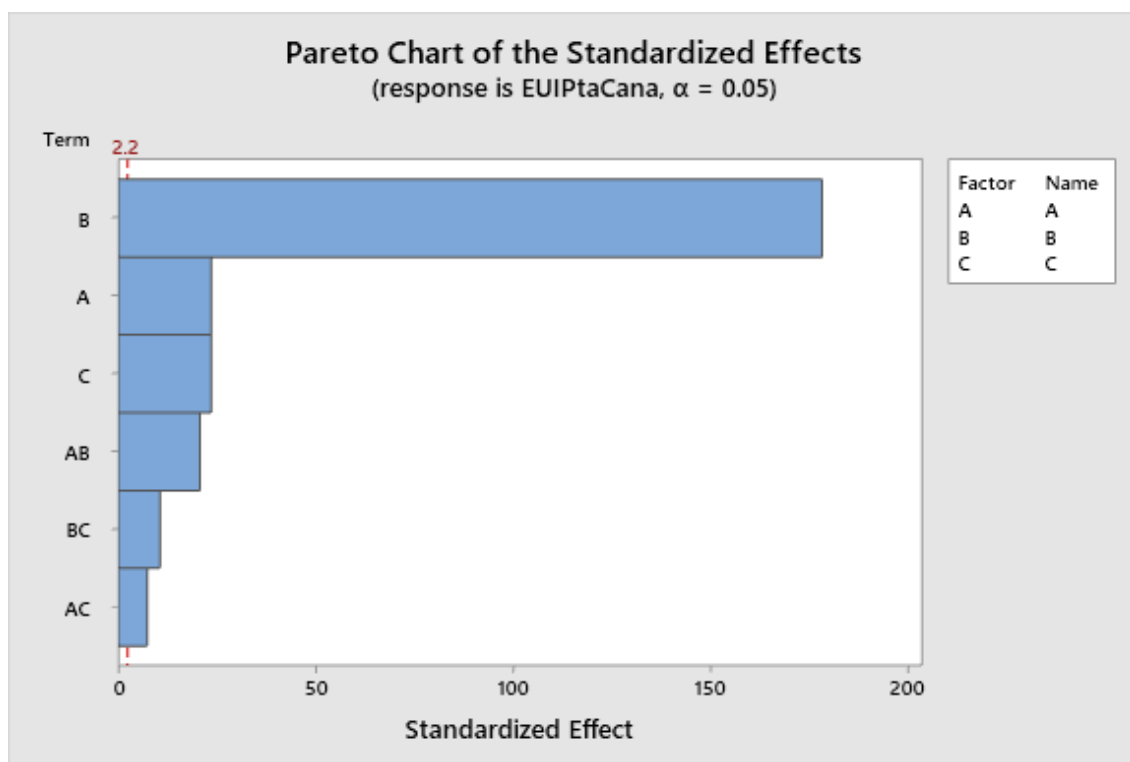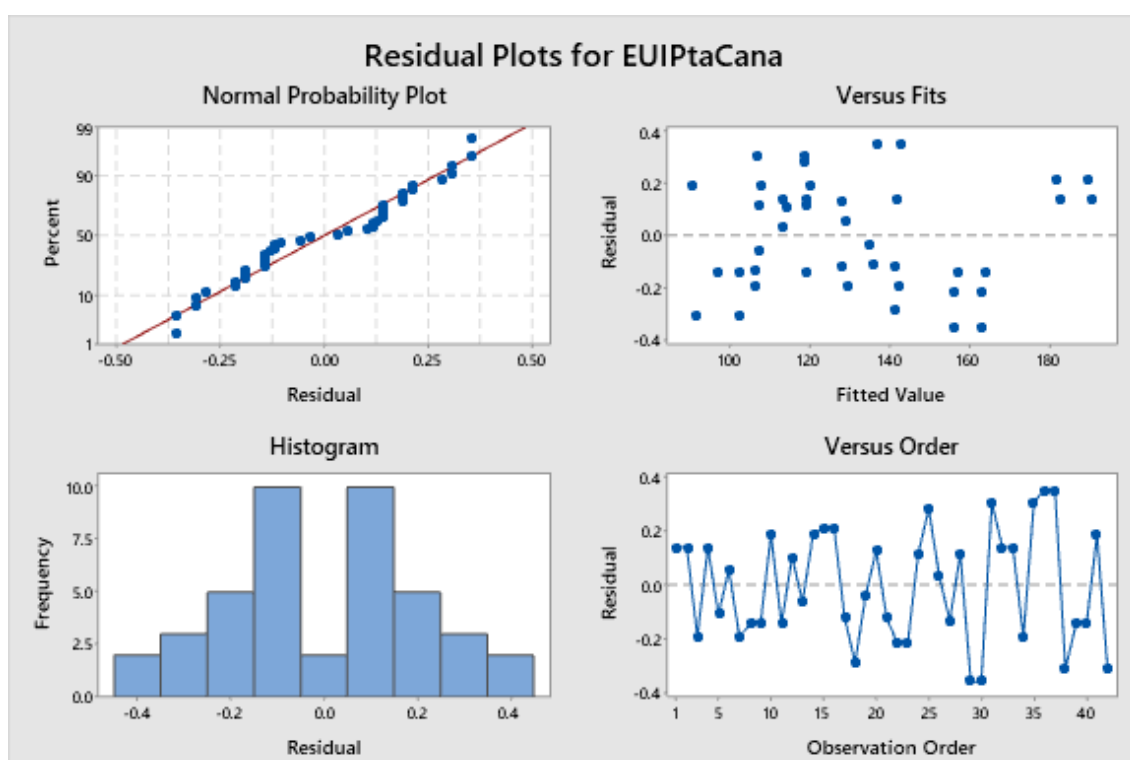

**Figure S3.** Graphics of Pareto Charts and Residual Plots for Punta Cana, Dominican Republic.

#### 4. Linear Regression and ANOVA Results via Minitab for Dubai, United Arab Emirates.

General Factorial Regression: EUIDubai versus A, B, C

**Table S16.** Factor Information for Dubai.

| Factor | Levels | Values              |
|--------|--------|---------------------|
| A      | 3      | 1, 2, 3             |
| B      | 2      | 1, 2                |
| C      | 7      | 1, 2, 3, 4, 5, 6, 7 |

**Table S17.** Analysis of Variance for Dubai.

| Source             | DF | Adj SS  | Adj MS  | F-Value   | P-Value |
|--------------------|----|---------|---------|-----------|---------|
| Model              | 29 | 43281.0 | 1492.45 | 31341.45  | 0.000   |
| Linear             | 9  | 43156.3 | 4795.15 | 100698.11 | 0.000   |
| A                  | 2  | 5707.2  | 2853.60 | 59925.50  | 0.000   |
| B                  | 1  | 4651.5  | 4651.52 | 97682.00  | 0.000   |
| C                  | 6  | 32797.6 | 5466.27 | 114791.67 | 0.000   |
| 2-Way Interactions | 20 | 124.7   | 6.24    | 130.95    | 0.000   |
| A*B                | 2  | 67.8    | 33.88   | 711.50    | 0.000   |
| A*C                | 12 | 29.8    | 2.48    | 52.17     | 0.000   |
| B*C                | 6  | 27.1    | 4.52    | 95.00     | 0.000   |
| Error              | 12 | 0.6     | 0.05    |           |         |
| Total              | 41 | 43281.6 |         |           |         |

**Table S18.** Model Summary for Dubai.

| S        | R-sq    | R-sq(adj) | R-sq(pred) |
|----------|---------|-----------|------------|
| 0.218218 | 100.00% | 100.00%   | 99.98%     |

**Table S19.** Coefficients for Dubai.

| Term     | Coef     | SE Coef | T-Value | P-Value | VIF  |
|----------|----------|---------|---------|---------|------|
| Constant | 245.238  | 0.034   | 7283.20 | 0.000   |      |
| A        |          |         |         |         |      |
| 1        | 12.1190  | 0.0476  | 254.50  | 0.000   | 1.33 |
| 2        | 3.6190   | 0.0476  | 76.00   | 0.000   | 1.33 |
| B        |          |         |         |         |      |
| 1        | 10.5238  | 0.0337  | 312.54  | 0.000   | 1.00 |
| C        |          |         |         |         |      |
| 1        | 43.0952  | 0.0825  | 522.50  | 0.000   | 1.71 |
| 2        | 43.2619  | 0.0825  | 524.52  | 0.000   | 1.71 |
| 3        | −24.4048 | 0.0825  | −295.89 | 0.000   | 1.71 |
| 4        | −15.4048 | 0.0825  | −186.77 | 0.000   | 1.71 |
| 5        | −6.5714  | 0.0825  | −79.67  | 0.000   | 1.71 |
| 6        | −14.4048 | 0.0825  | −174.65 | 0.000   | 1.71 |
| A*B      |          |         |         |         |      |
| 1 1      | 1.2619   | 0.0476  | 26.50   | 0.000   | 1.33 |
| 2 1      | 0.4762   | 0.0476  | 10.00   | 0.000   | 1.33 |

|     |         |        |       |       |      |
|-----|---------|--------|-------|-------|------|
| A*C |         |        |       |       |      |
| 1 1 | 1.548   | 0.117  | 13.27 | 0.000 | 2.29 |
| 1 2 | 1.381   | 0.117  | 11.84 | 0.000 | 2.29 |
| 1 3 | -0.952  | 0.117  | -8.16 | 0.000 | 2.29 |
| 1 4 | -0.452  | 0.117  | -3.88 | 0.002 | 2.29 |
| 1 5 | -0.286  | 0.117  | -2.45 | 0.031 | 2.29 |
| 1 6 | -0.452  | 0.117  | -3.88 | 0.002 | 2.29 |
| 2 1 | 0.048   | 0.117  | 0.41  | 0.690 | 2.29 |
| 2 2 | 0.381   | 0.117  | 3.27  | 0.007 | 2.29 |
| 2 3 | 0.048   | 0.117  | 0.41  | 0.690 | 2.29 |
| 2 4 | 0.048   | 0.117  | 0.41  | 0.690 | 2.29 |
| 2 5 | -0.286  | 0.117  | -2.45 | 0.031 | 2.29 |
| 2 6 | 0.048   | 0.117  | 0.41  | 0.690 | 2.29 |
| B*C |         |        |       |       |      |
| 1 1 | 1.1429  | 0.0825 | 13.86 | 0.000 | 1.71 |
| 1 2 | 1.3095  | 0.0825 | 15.88 | 0.000 | 1.71 |
| 1 3 | -0.6905 | 0.0825 | -8.37 | 0.000 | 1.71 |
| 1 4 | -0.3571 | 0.0825 | -4.33 | 0.001 | 1.71 |
| 1 5 | -0.1905 | 0.0825 | -2.31 | 0.040 | 1.71 |
| 1 6 | -0.3571 | 0.0825 | -4.33 | 0.001 | 1.71 |

Table S20. Regression Equation for Dubai.

$$\begin{aligned}
 \text{EUIDubai} = & 245.238 + 12.1190 A\_1 + 3.6190 A\_2 - 15.7381 A\_3 + 10.5238 B\_1 - 10.5238 B\_2 \\
 & + 43.0952 C\_1 + 43.2619 C\_2 - 24.4048 C\_3 - 15.4048 C\_4 - 6.5714 C\_5 - 14.4048 C\_6 \\
 & - 25.5714 C\_7 + 1.2619 A*B\_1\ 1 - 1.2619 A*B\_1\ 2 + 0.4762 A*B\_2\ 1 - 0.4762 A*B\_2\ 2 \\
 & - 1.7381 A*B\_3\ 1 + 1.7381 A*B\_3\ 2 + 1.548 A*C\_1\ 1 + 1.381 A*C\_1\ 2 - 0.952 A*C\_1\ 3 \\
 & - 0.452 A*C\_1\ 4 - 0.286 A*C\_1\ 5 - 0.452 A*C\_1\ 6 - 0.786 A*C\_1\ 7 + 0.048 A*C\_2\ 1 \\
 & + 0.381 A*C\_2\ 2 + 0.048 A*C\_2\ 3 + 0.048 A*C\_2\ 4 - 0.286 A*C\_2\ 5 + 0.048 A*C\_2\ 6 \\
 & - 0.286 A*C\_2\ 7 - 1.595 A*C\_3\ 1 - 1.762 A*C\_3\ 2 + 0.905 A*C\_3\ 3 + 0.405 A*C\_3\ 4 \\
 & + 0.571 A*C\_3\ 5 + 0.405 A*C\_3\ 6 + 1.071 A*C\_3\ 7 + 1.1429 B*C\_1\ 1 + 1.3095 B*C\_1\ 2 \\
 & - 0.6905 B*C\_1\ 3 - 0.3571 B*C\_1\ 4 - 0.1905 B*C\_1\ 5 - 0.3571 B*C\_1\ 6 - 0.8571 B*C\_1\ 7 \\
 & - 1.1429 B*C\_2\ 1 - 1.3095 B*C\_2\ 2 + 0.6905 B*C\_2\ 3 + 0.3571 B*C\_2\ 4 \\
 & + 0.1905 B*C\_2\ 5 + 0.3571 B*C\_2\ 6 + 0.8571 B*C\_2\ 7
 \end{aligned}$$

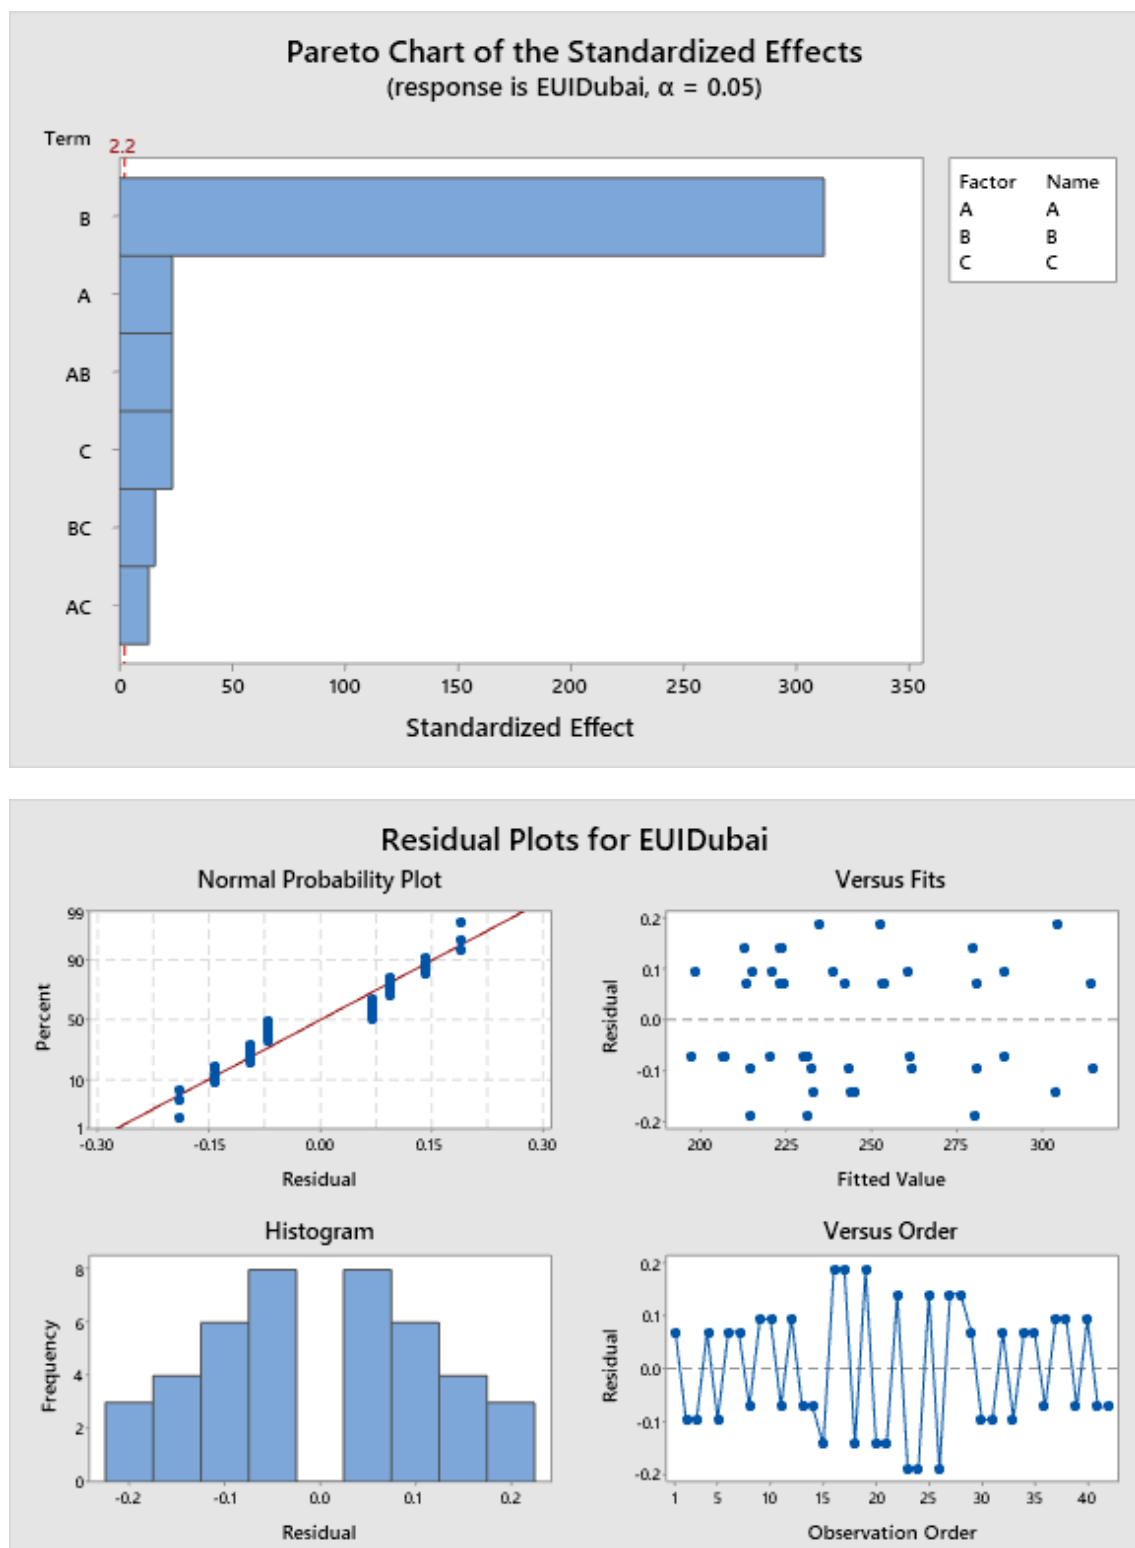

**Figure S4.** Graphics of Pareto Charts and Residual Plots for Dubai, United Arab Emirates.

## 5. Linear Regression and ANOVA Results via Minitab for Sydney, Australia.

*General Factorial Regression: EUISydney versus A, B, C*

**Table S21.** Factor Information for Sydney.

| Factor | Levels | Values |
|--------|--------|--------|
|--------|--------|--------|

|   |   |                     |
|---|---|---------------------|
| A | 3 | 1, 2, 3             |
| B | 2 | 1, 2                |
| C | 7 | 1, 2, 3, 4, 5, 6, 7 |

**Table S22.** Analysis of Variance for Sydney.

| Source             | DF | Adj SS  | Adj MS  | F-Value  | P-Value |
|--------------------|----|---------|---------|----------|---------|
| Model              | 29 | 60720.5 | 2093.81 | 6434.64  | 0.000   |
| Linear             | 9  | 60579.1 | 6731.01 | 20685.55 | 0.000   |
| A                  | 2  | 5156.3  | 2578.17 | 7923.15  | 0.000   |
| B                  | 1  | 2640.2  | 2640.21 | 8113.83  | 0.000   |
| C                  | 6  | 52782.6 | 8797.10 | 27034.98 | 0.000   |
| 2-Way Interactions | 20 | 141.4   | 7.07    | 21.72    | 0.000   |
| A*B                | 2  | 72.4    | 36.21   | 111.29   | 0.000   |
| A*C                | 12 | 44.0    | 3.67    | 11.27    | 0.000   |
| B*C                | 6  | 25.0    | 4.16    | 12.78    | 0.000   |
| Error              | 12 | 3.9     | 0.33    |          |         |
| Total              | 41 | 60724.4 |         |          |         |

**Table S23.** Model Summary for Sydney.

| S        | R-sq   | R-sq(adj) | R-sq(pred) |
|----------|--------|-----------|------------|
| 0.570436 | 99.99% | 99.98%    | 99.92%     |

**Table S24.** Coefficients for Sydney.

| Term     | Coef    | SE Coef | T-Value | P-Value | VIF  |
|----------|---------|---------|---------|---------|------|
| Constant | 282.119 | 0.088   | 3205.17 | 0.000   |      |
| A        |         |         |         |         |      |
| 1        | 14.095  | 0.124   | 113.23  | 0.000   | 1.33 |
| 2        | −1.119  | 0.124   | −8.99   | 0.000   | 1.33 |
| B        |         |         |         |         |      |
| 1        | 7.9286  | 0.0880  | 90.08   | 0.000   | 1.00 |
| C        |         |         |         |         |      |
| 1        | 45.048  | 0.216   | 208.94  | 0.000   | 1.71 |
| 2        | 37.548  | 0.216   | 174.15  | 0.000   | 1.71 |
| 3        | −40.119 | 0.216   | −186.08 | 0.000   | 1.71 |
| 4        | 17.548  | 0.216   | 81.39   | 0.000   | 1.71 |
| 5        | 17.714  | 0.216   | 82.16   | 0.000   | 1.71 |
| 6        | −31.619 | 0.216   | −146.65 | 0.000   | 1.71 |
| A*B      |         |         |         |         |      |
| 1 1      | 1.857   | 0.124   | 14.92   | 0.000   | 1.33 |
| 2 1      | −0.929  | 0.124   | −7.46   | 0.000   | 1.33 |
| A*C      |         |         |         |         |      |
| 1 1      | 1.738   | 0.305   | 5.70    | 0.000   | 2.29 |
| 1 2      | 1.238   | 0.305   | 4.06    | 0.002   | 2.29 |
| 1 3      | −1.595  | 0.305   | −5.23   | 0.000   | 2.29 |
| 1 4      | 0.738   | 0.305   | 2.42    | 0.032   | 2.29 |
| 1 5      | 0.571   | 0.305   | 1.87    | 0.085   | 2.29 |
| 1 6      | −1.095  | 0.305   | −3.59   | 0.004   | 2.29 |
| 2 1      | −0.048  | 0.305   | −0.16   | 0.878   | 2.29 |

|     |        |       |       |       |      |
|-----|--------|-------|-------|-------|------|
| 2 2 | −0.048 | 0.305 | −0.16 | 0.878 | 2.29 |
| 2 3 | 0.119  | 0.305 | 0.39  | 0.703 | 2.29 |
| 2 4 | −0.048 | 0.305 | −0.16 | 0.878 | 2.29 |
| 2 5 | −0.214 | 0.305 | −0.70 | 0.496 | 2.29 |
| 2 6 | 0.119  | 0.305 | 0.39  | 0.703 | 2.29 |
| B*C |        |       |       |       |      |
| 1 1 | 0.905  | 0.216 | 4.20  | 0.001 | 1.71 |
| 1 2 | 0.738  | 0.216 | 3.42  | 0.005 | 1.71 |
| 1 3 | −0.929 | 0.216 | −4.31 | 0.001 | 1.71 |
| 1 4 | 0.405  | 0.216 | 1.88  | 0.085 | 1.71 |
| 1 5 | 0.571  | 0.216 | 2.65  | 0.021 | 1.71 |
| 1 6 | −0.762 | 0.216 | −3.53 | 0.004 | 1.71 |

Table S25. Regression Equation for Sydney.

$$\begin{aligned}
 \text{EUISydney} = & 282.119 + 14.095 A_1 - 1.119 A_2 - 12.976 A_3 + 7.9286 B_1 - 7.9286 B_2 \\
 & + 45.048 C_1 + 37.548 C_2 - 40.119 C_3 + 17.548 C_4 + 17.714 C_5 - 31.619 C_6 \\
 & - 46.119 C_7 + 1.857 A*B_1 - 1.857 A*B_2 - 0.929 A*B_3 + 0.929 A*B_4 \\
 & - 0.929 A*B_5 + 0.929 A*B_6 + 1.738 A*C_1 + 1.238 A*C_2 - 1.595 A*C_3 \\
 & + 0.738 A*C_4 + 0.571 A*C_5 - 1.095 A*C_6 - 1.595 A*C_7 - 0.048 A*C_8 \\
 & - 0.048 A*C_9 + 0.119 A*C_{10} - 0.048 A*C_{11} - 0.214 A*C_{12} + 0.119 A*C_{13} \\
 & + 0.119 A*C_{14} - 1.690 A*C_{15} - 1.190 A*C_{16} + 1.476 A*C_{17} - 0.690 A*C_{18} \\
 & - 0.357 A*C_{19} + 0.976 A*C_{20} + 1.476 A*C_{21} + 0.905 B*C_1 + 0.738 B*C_2 \\
 & - 0.929 B*C_3 + 0.405 B*C_4 + 0.571 B*C_5 - 0.762 B*C_6 - 0.929 B*C_7 \\
 & - 0.905 B*C_8 - 0.738 B*C_9 + 0.929 B*C_{10} - 0.405 B*C_{11} - 0.571 B*C_{12} \\
 & + 0.762 B*C_{13} + 0.929 B*C_{14}
 \end{aligned}$$

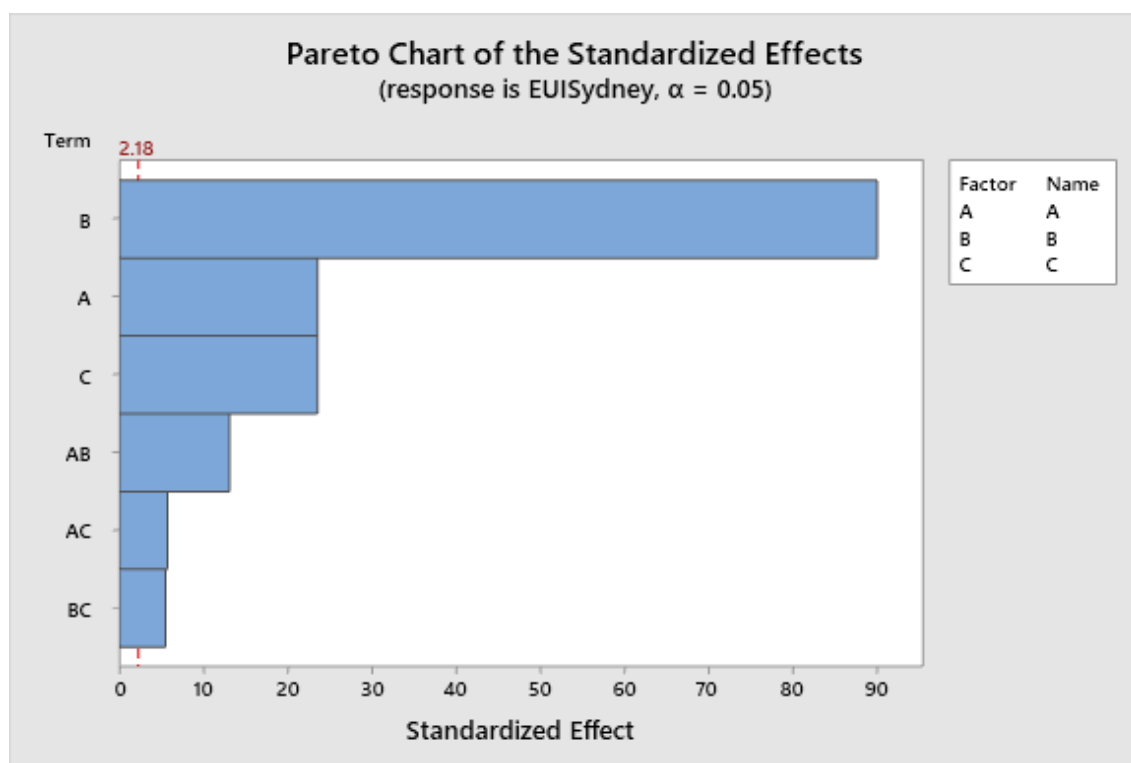

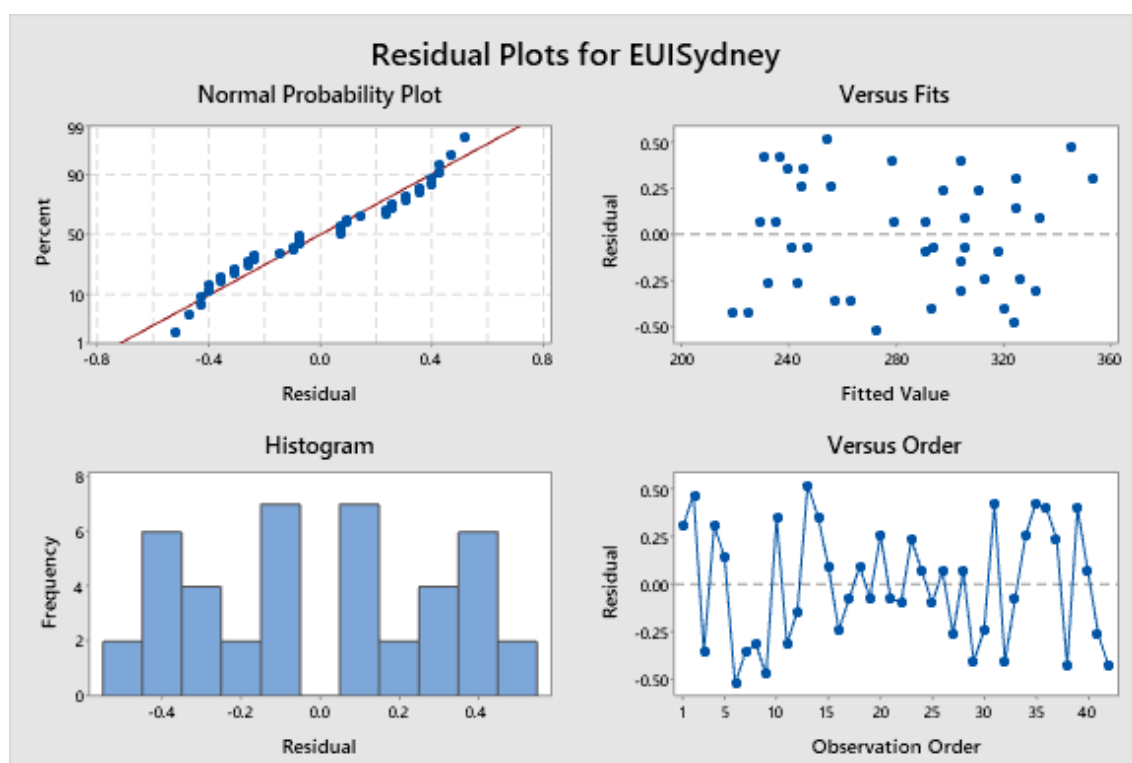

**Figure S5.** Graphics of Pareto Charts and Residual Plots for Sydney, Australia.
